# Supplementary material
Source: publisher site journal article supplement (https://www.dovepress.com/article/350869)
Supplement: Supplementary file 1 [file get_supplementary_file.php]

**Supplement Figures and Tables**


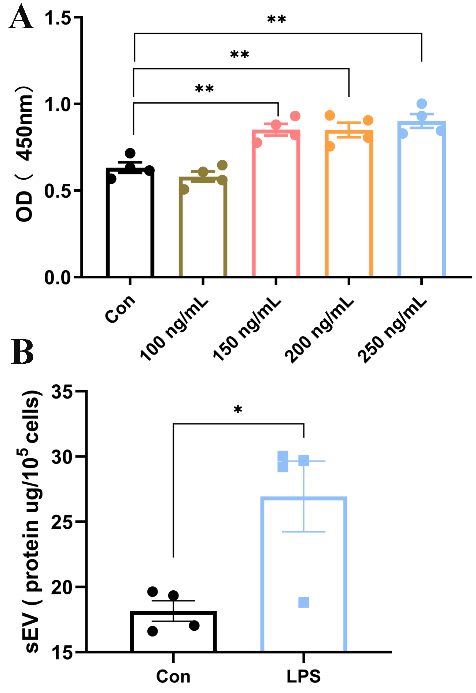


**Supplementary Figure 1** (A) The DFSCs were treated with LPS (100, 150, 200, and 250 ng/mL) for 24h, and the cell proliferation was measured by CCK-8 assay. (B) Total protein of sEV secreted by DFSCs and LPS-preconditioned DFSCs detected by the BCA method. Data are shown as mean ± SEM for three independent experiments. *P < 0.05; **P < 0.01.

**Abbreviations**: LPS, lipopolysaccharide；DFSCs, dental follicle stem cells；OD, optical density. CCK-8, cell counting kit-8.

**Supplementary Table 1. The Sequence of Primers**

| **Primer Name** | **Forward** | **Reverse** |
| --- | --- | --- |
| Mouse-CD206 | TCAATGCCACTGCCATGCCTAC | AGCTTGCCGTGCGTCTTGC |
| Mouse-Arg-1 | AGTGTGGTGCTGGGTGGAGAC | GCTGGTTGTCAGGGGAGTGTTG |
| Mouse-GAPDH | AAGAAGGTGGTGAAGCAGGCATC | CGGCATCGAAGGTGGAAGAGTG |

**Supplementary Table 2. The Antibodies Used in the Study**

| Abbreviation | Antibody full name | Manufacture | Product No. | Concentration | Application |
| --- | --- | --- | --- | --- | --- |
| Hsp70 | Heat shock protein 70 | Zen Bioscience, China | 200304 | 1:1000 | WB |
| Tsg101 | Tumor susceptibility gene 101 | Abcam, UK | ab125011 | 1:1000 | WB |
| CD63 | Cluster of differentiation 63 | Zen Bioscience, China | 510953 | 1:1000 | WB |
| RANKL | Receptor or Activator of NF-KB Ligand | Zen Bioscience, China | 252109 | 1:1000 | WB |
| RANKL | Receptor or Activator of NF-KB Ligand | Santa Cruz, USA | sc-7628 | 1:200 | IF |
| OPG | anti-Osteoprotegerin antibody | Abcam, UK | ab73400 | 1:1000 | WB |
| OPG | anti-Osteoprotegerin antibody | Abcam, UK | Ab124800 | 1:200 | IF |
| Periostin |  | Santa Cruz, USA | sc-67233 | 1:200 | IF |
| ERK1/2 | anti-Erk1/2 | CST, USA | #4695 | 1:1000 | WB |
| p-ERK1/2 | anti-phosphorylated Erk1/2 | CST, USA | #4370 | 1:1000 | WB |
| JNK | SAPK/JNK (56G8) | CST, USA | #9258 | 1:1000 | WB |
| p-JNK | phospho-SAPK/JNK  (Thr183/Tyr185) (81E11)  antibody | CST, USA | #4668 | 1:1000 | WB |
| SOD1 | Superoxide Dismutase 1 | Zen Bioscience, China | 350163 | 1:1000 | WB |
| SOD2 | Superoxide Dismutase 2 | Santa Cruz, USA | sc-133254 | 1:1000 | WB |
| F4/80 | anti F4/80 antibody [SP115] | Abcam,  UK | ab240946 | 1:200 | Flow Cytometry |
| CD206 | CD206 | Santa Cruz, USA | sc-58986 | 1:200 | Flow Cytometry |
| CD206 | CD206 | Santa Cruz, USA | sc-34577 | 1:200 | IF |
| GAPDH | Glyceraldehyde-3-phosphate dehydrogenase | Zen Bioscience, China | 200306-7E4 | 1:5000 | WB |
